# Supplementary material
Source: PubMed Central journal article supplement (PMC5885178)
Supplement: jamaneurol-75-573-s001.pdf [file jamaneurol-75-573-s001.pdf]

## Supplementary Online Content

Wahbi K, Porcher R, Laforêt P, et al. Development and validation of a new scoring system to predict survival in patients with myotonic dystrophy type 1. *JAMA Neurol*. Published online February 5, 2018. doi:10.1001/jamaneurol.2017.4778

**eTable.** Primary causes of 241 deaths in the derivation cohort classified according to the *International Statistical Classification of Diseases and Related Health Problems, Tenth Revision*

**eFigure 1.** Overall survival of the 1066 patients in the derivation cohort

**eFigure 2.** Calibration curve of 10-year survival

This supplementary material has been provided by the authors to give readers additional information about their work.

**eTable.** Primary causes of 241 deaths in the derivation cohort classified according to the *International Statistical Classification of Diseases and Related Health Problems, Tenth Revision*

| Causes of death                                                                           | Number            | ICD code       |
|-------------------------------------------------------------------------------------------|-------------------|----------------|
| <b>Cancer of:</b>                                                                         | <b>33 (13.6%)</b> | <b>C00-C97</b> |
| Stomach                                                                                   | 4                 | C16            |
| Colon                                                                                     | 2                 | C18            |
| Rectum                                                                                    | 1                 | C20            |
| Pancreas                                                                                  | 2                 | C25            |
| Larynx                                                                                    | 1                 | C32            |
| Bronchus and lung                                                                         | 5                 | C34            |
| Skin (melanoma)                                                                           | 1                 | C43            |
| Breast                                                                                    | 1                 | C50            |
| Uterus                                                                                    | 2                 | C55            |
| Ovary                                                                                     | 2                 | C56            |
| Prostate                                                                                  | 1                 | C61            |
| Brain                                                                                     | 2                 | C71            |
| Thyroid gland                                                                             | 1                 | C73            |
| Site unspecified                                                                          | 3                 | C80            |
| <b>Other malignancies</b>                                                                 |                   |                |
| Follicular lymphoma                                                                       | 1                 | C82            |
| Multiple myeloma                                                                          | 2                 | C90.0          |
| Myeloid leukemia                                                                          | 1                 | C92            |
| Uncertain or unknown behavior of unspecified sites                                        | 1                 | D48            |
| <b>Diseases of the circulatory system</b>                                                 | <b>76 (31.4%)</b> | <b>I00-I99</b> |
| Acute myocardial infarction                                                               | 4                 | I21            |
| Cardiac arrest                                                                            | 4                 | I46            |
| Cerebral infarction                                                                       | 2                 | I63            |
| Heart failure                                                                             | 13                | I50.1          |
| Intracerebral hemorrhage                                                                  | 1                 | I61            |
| Pulmonary embolism                                                                        | 19                | I26            |
| Sudden cardiac death                                                                      | 33                | I46.1          |
| <b>Diseases of the respiratory system</b>                                                 | <b>80 (18.2%)</b> | <b>J00-J99</b> |
| Chronic respiratory failure                                                               | 3                 | J96.1          |
| Pneumonia                                                                                 | 31                | J18            |
| Pneumothorax                                                                              | 1                 | J93            |
| Pulmonary collapse                                                                        | 1                 | J98.1          |
| Respiratory failure                                                                       | 43                | J96            |
| Tracheostomy malfunction                                                                  | 1                 | J96.0          |
| <b>Diseases of the digestive system</b>                                                   | <b>5 (2.0%)</b>   | <b>K00-K93</b> |
| Acute pancreatitis                                                                        | 1                 | K85            |
| Obstruction of duodenum                                                                   | 2                 | K31.5          |
| Colostomy and enterostomy malfunction                                                     | 1                 | K91.4          |
| Vascular disorders of intestine                                                           | 1                 | K55.8          |
| <b>Clinical symptoms or signs and abnormal laboratory tests, not elsewhere classified</b> | <b>26 (10.7%)</b> | <b>R00-R99</b> |
| Cardiorespiratory failure                                                                 | 1                 | R09.2          |
| Coma                                                                                      | 3                 | R40.2          |
| Other ill-defined and unspecified causes of death                                         | 15                | R99            |
| Septic shock                                                                              | 3                 | R57.2          |
| Unwitnessed death                                                                         | 4                 | R98            |
| <b>Injury, poisoning and other consequences of external causes</b>                        | <b>11 (4.5%)</b>  | <b>S00-T98</b> |
|                                                                                           | 3                 | T04            |
| Crush injuries involving multiple body regions                                            | 8                 | S06.9          |
| Intracranial injury                                                                       |                   |                |
| <b>External causes of morbidity and mortality</b>                                         | <b>10 (4.1%)</b>  | <b>V01-Y98</b> |
| Inhalation and ingestion of food obstructing the respiratory tract                        | 10                | W79            |

**eFigure 1.** Overall survival of the 1066 patients in the derivation cohort

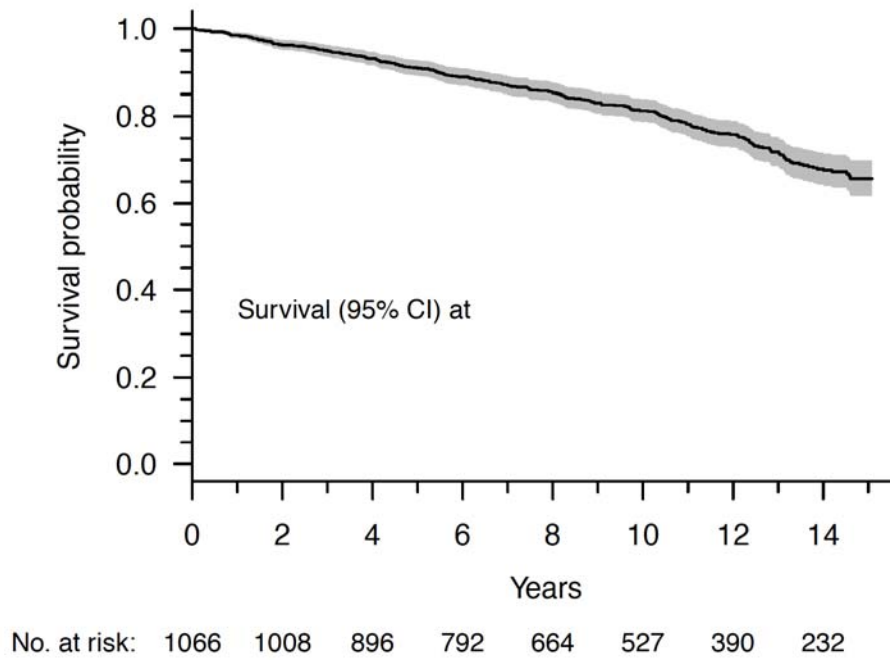

The grey shaded area indicates the pointwise 95% CI.

**eFigure 2.** Calibration curve of 10-year survival

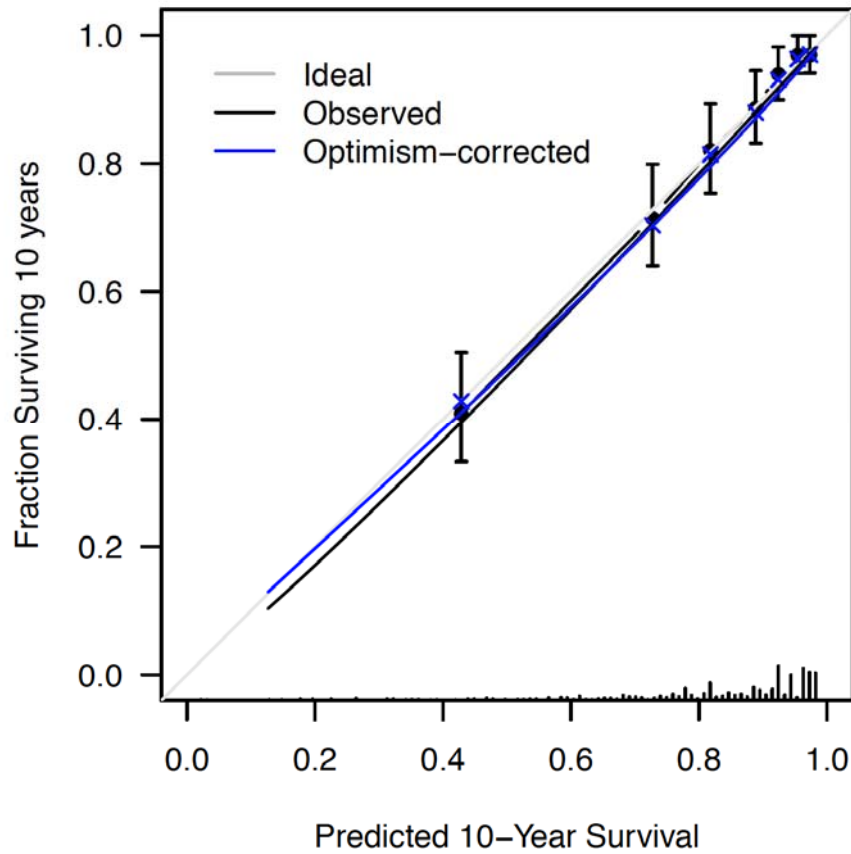

The x axis is the model-predicted probability of survival, and the y axis is the observed survival. The grey 45 degrees reference line indicates a perfect calibration. The black data points show the Kaplan-Meier survival for groups of approximately 150 patients, with their 95% CI. The blue crosses show the corresponding optimism-corrected values.
